# Supplementary material for: Efficient Hydrogen and Oxygen Evolution Catalysis Using 3D-Structured Nickel Phosphosulfide Nanosheets in Alkaline Media
Source: MDPI journal article supplement (doi:10.3390/molecules28010315), 2022-12-30
Supplement: s1 [file s1]

# Supporting information

## **Efficient Hydrogen and Oxygen Evolution Catalysis Using 3D-Structured Nickel Phosphosulfide Nanosheets in Alkaline Media**

Lei Lin<sup>1</sup>, Qiang Fu<sup>1,\*</sup>, Junbei Hu<sup>1</sup>, Ran Wang<sup>2</sup>, Xianjie Wang<sup>1,\*</sup>

<sup>1</sup> School of Physics, Harbin Institute of Technology, Harbin 150001, China

<sup>2</sup> National Key Laboratory of Science and Technology on Advanced Composites in Special Environments, Harbin Institute of Technology, Harbin 150001, China

\* Correspondence: fqianghit@163.com (Q.F.); wangxianjie@hit.edu.cn (X.-J.W.)

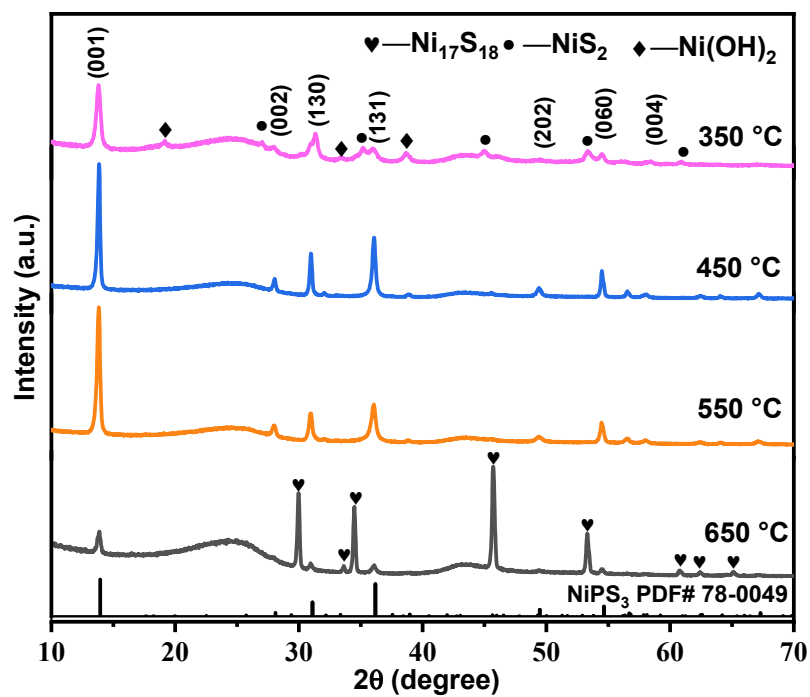

**Figure S1.** The XRD patterns of the as-prepared NiPS<sub>3</sub> NS/CC samples at different temperatures.

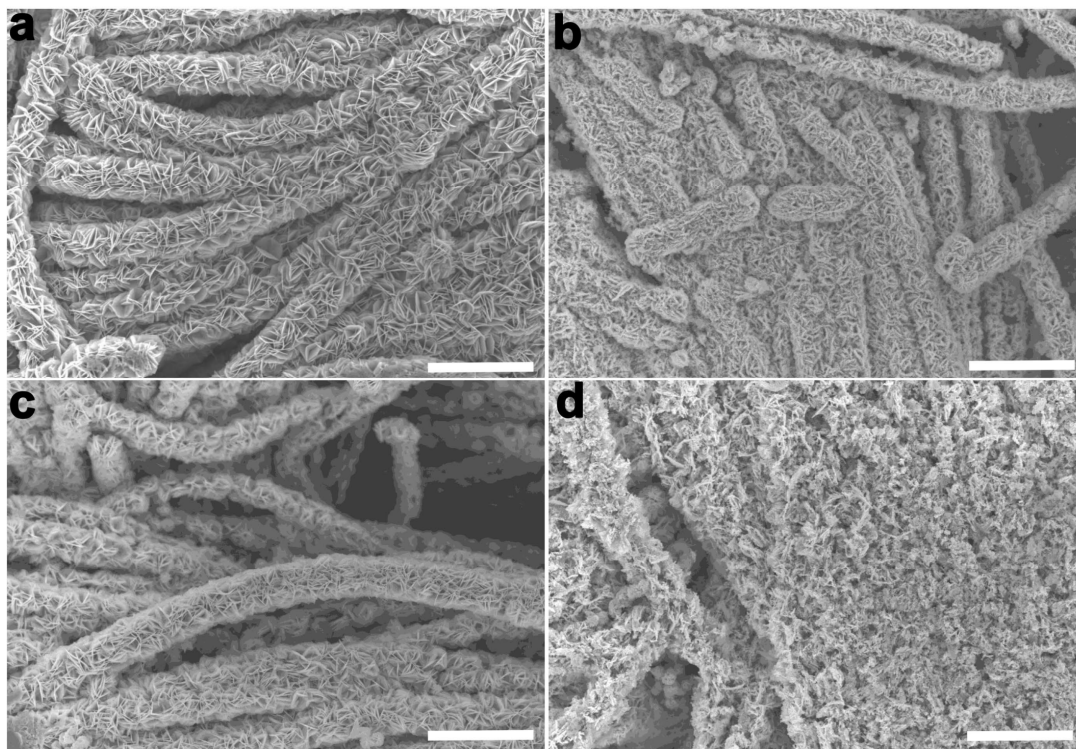

**Figure S2.** The SEM image of the as-prepared NiPS<sub>3</sub> NS/CC samples at 350°C(a), 450°C(b), 550°C(c), 650°C(d) (Scale bar: 50 μm).

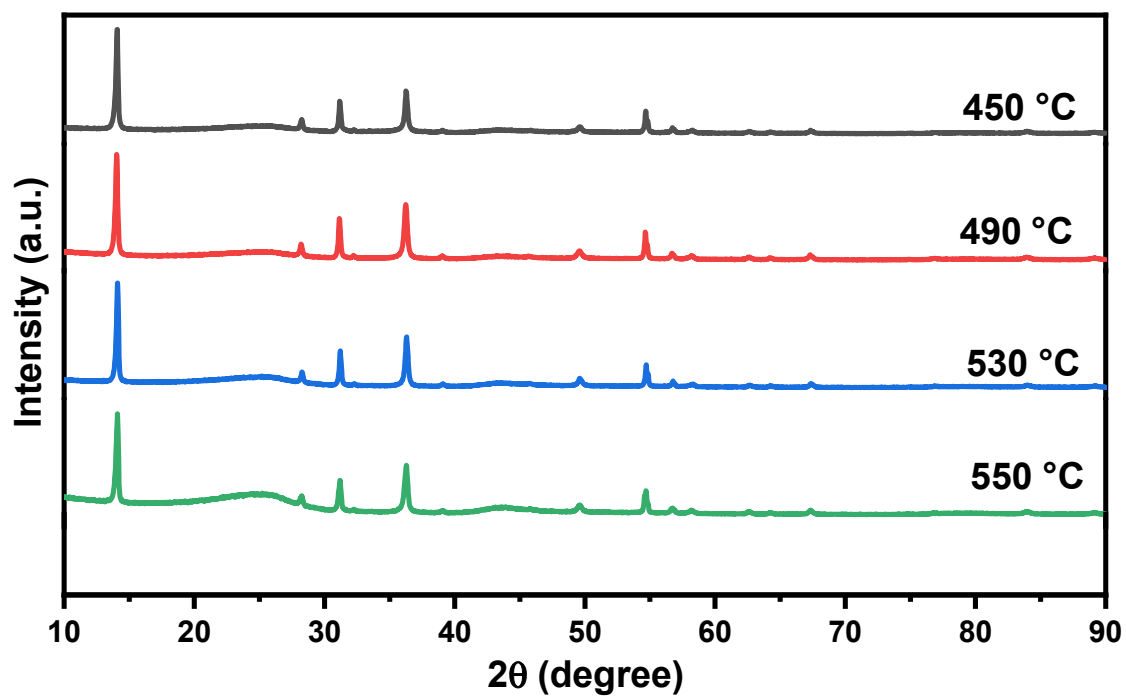

**Figure S3.** The XRD patterns of the as-prepared NiPS<sub>3</sub> NS/CC samples at 450 °C to 550 °C.

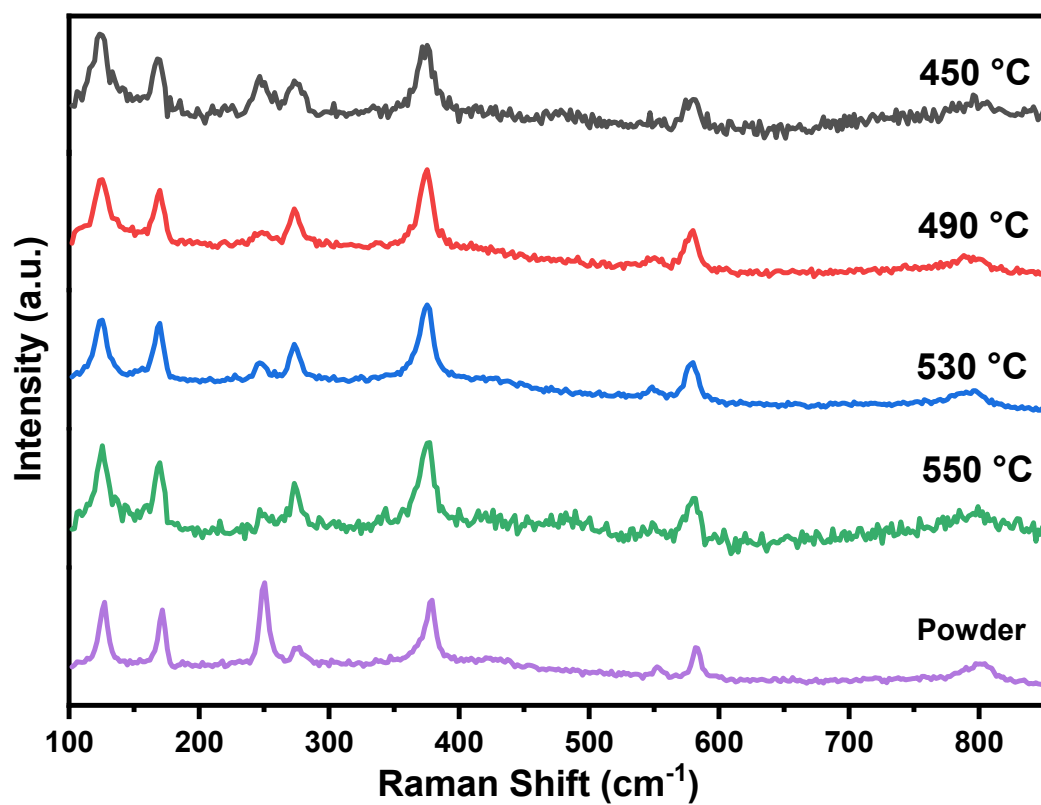

**Figure S4.** Raman spectra of the NiPS<sub>3</sub> NS/CC samples prepared under different temperatures and the NiPS<sub>3</sub> Powder sample

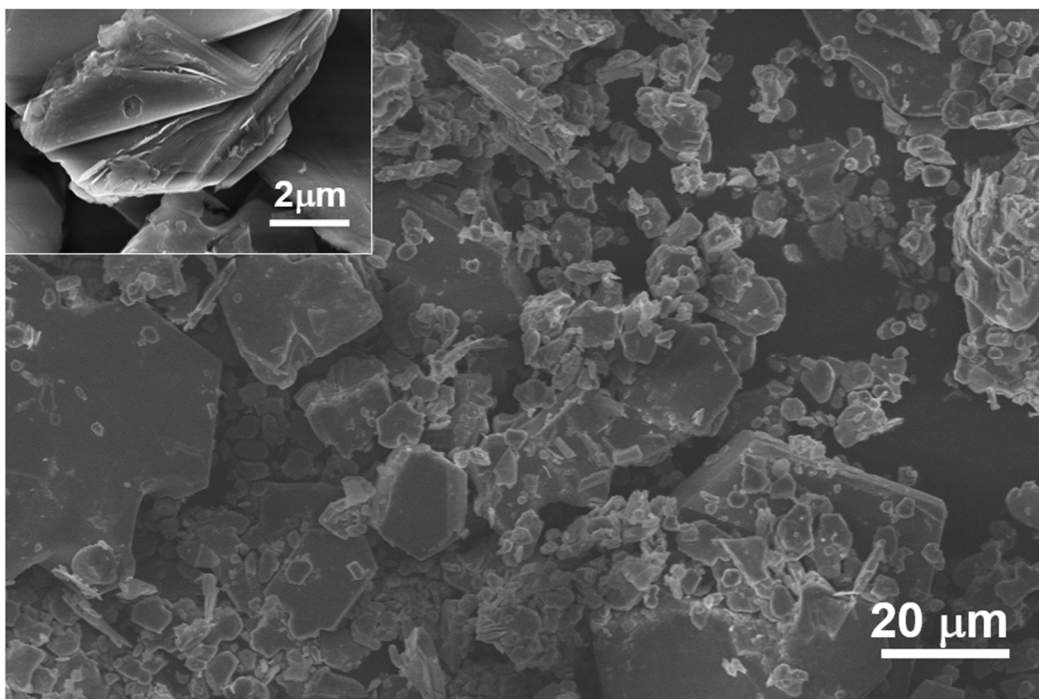

**Figure S5.** The SEM image of the as-prepared NiPS<sub>3</sub> powder sample (inset showed the enlarged image of the powder, which showed layered structure of NiPS<sub>3</sub>).

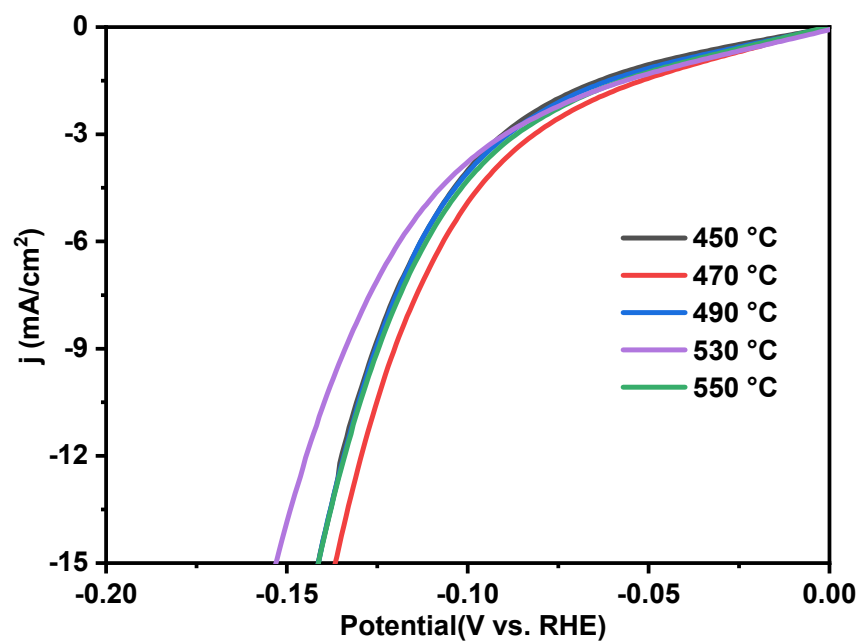

**Figure S6.** Polarization curves of different sample prepared under different temperatures.

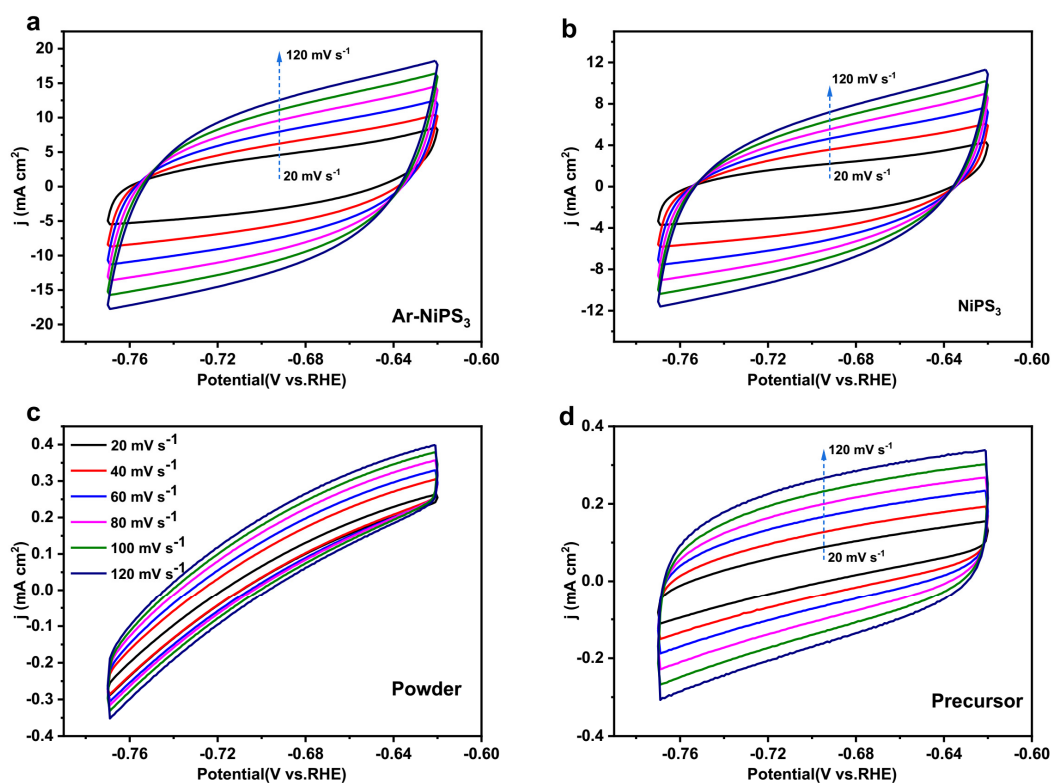

**Figure S7.** CV curves of (a) Ar-NiPS<sub>3</sub> NS/CC, (b) NiPS<sub>3</sub> NS/CC, (c) NiPS<sub>3</sub> Powder and (d) Ni Precursor under different scan rates, in the potential range from -0.62 V to -0.77 V vs. RHE. These data were used to generate the plots showing the extraction of the  $C_{dl}$  for different samples shown in Figure 3d.



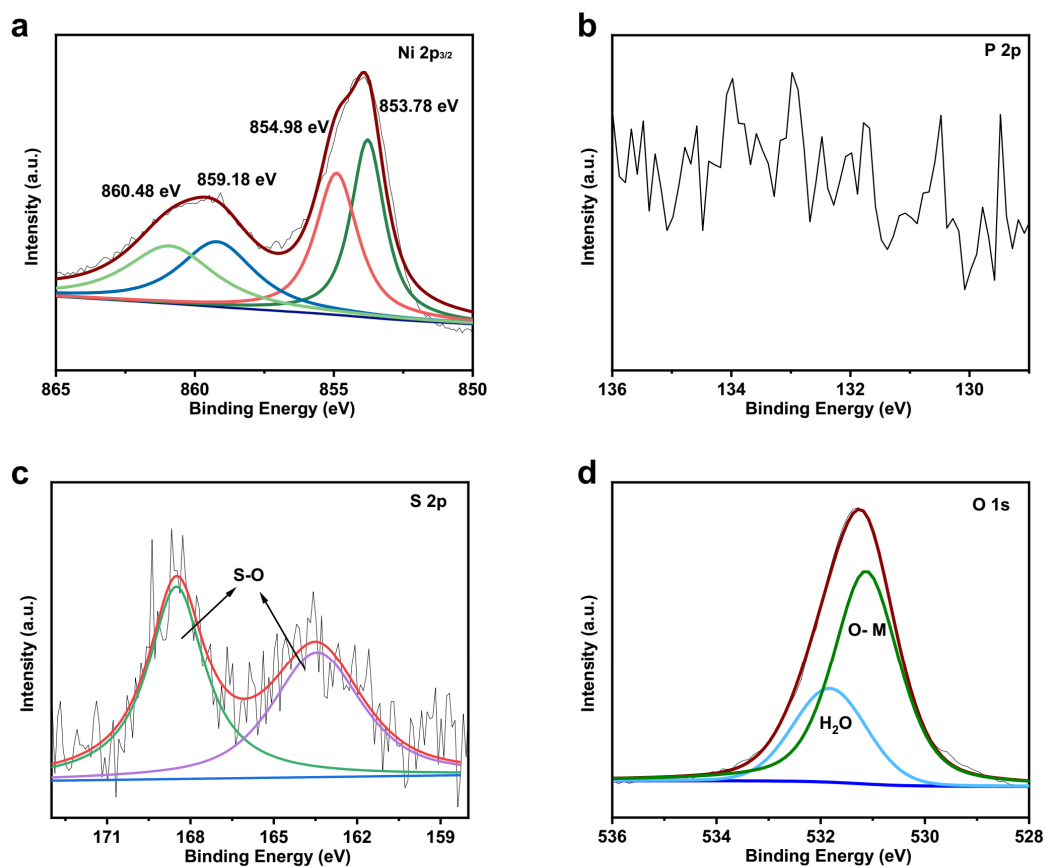

**Figure S8.** XPS spectra of (a) Ni 2p<sub>3/2</sub>, (b) P 2p, (c) S 2p, and (d) O 1s after OER test.

**Table S1.** HER data obtained from the corresponding LSV curves.

| <b>Catalyst</b>          | <b>Tafel slope<br/>(mV dec<sup>-1</sup>)</b> | <b>Overpotential (mV) at<br/>10 mA cm<sup>-2</sup></b> | <b>Electrolyte</b> |
|--------------------------|----------------------------------------------|--------------------------------------------------------|--------------------|
| Ni-precursor             | 283.7                                        | 436.41                                                 | 1 M KOH            |
| NiPS <sub>3</sub> Powder | 132.2                                        | 256.57                                                 | 1 M KOH            |
| NiPS <sub>3</sub> NS     | 95.5                                         | 125.18                                                 | 1 M KOH            |
| Ar-NiPS <sub>3</sub> NS  | 66.5                                         | 103.10                                                 | 1 M KOH            |

**Table S2.** OER data obtained from the corresponding LSV curves.

| <b>Catalyst</b>          | <b>Tafel slope<br/>(mV dec<sup>-1</sup>)</b> | <b>Overpotential (mV) at<br/>50 mA cm<sup>-2</sup></b> | <b>Electrolyte</b> |
|--------------------------|----------------------------------------------|--------------------------------------------------------|--------------------|
| Ni-precursor             | 152.8                                        | 490.01                                                 | 1 M KOH            |
| NiPS <sub>3</sub> Powder | 267.1                                        | 475.08                                                 | 1 M KOH            |
| NiPS <sub>3</sub> NS     | 127.9                                        | 317.86                                                 | 1 M KOH            |
| Ar-NiPS <sub>3</sub> NS  | 124.0                                        | 278.89                                                 | 1 M KOH            |

**Table S3.** Comparison of some reported HER electrocatalysts in 1 M KOH.

| <b>Catalyst</b>                                            | <b>Tafel slope<br/>(mV dec<sup>-1</sup>)</b> | <b>Overpotential (mV)<br/>at 10 mA cm<sup>-2</sup></b> | <b>Ref.</b>      |
|------------------------------------------------------------|----------------------------------------------|--------------------------------------------------------|------------------|
| Ni-Co-S/CF                                                 | 96                                           | 140                                                    | [1]              |
| NiS <sub>2</sub>                                           | 79                                           | 148                                                    | [2]              |
| Ni <sub>2</sub> P                                          | 116                                          | 218                                                    | [3]              |
| Ni <sub>0.9</sub> Fe <sub>0.1</sub> PS <sub>3</sub> /Mxene | 114                                          | 196                                                    | [4]              |
| Ni <sub>3</sub> S <sub>2</sub>                             | 97                                           | 335                                                    | [5]              |
| NiS/MoO <sub>3</sub> /NF                                   | 122.3                                        | 150                                                    | [6]              |
| NiFe-LDH/NiCoP/NF                                          | 88.2                                         | 120                                                    | [7]              |
| Co <sub>9</sub> S <sub>8</sub>                             | 97.6                                         | 128                                                    | [8]              |
| FeP                                                        | 97                                           | 165                                                    | [9]              |
| MoS <sub>2</sub> /NiS                                      | 97                                           | 244                                                    | [10]             |
| <b>Ar-NiPS<sub>3</sub></b>                                 | <b>66.5</b>                                  | <b>103.10</b>                                          | <b>This Work</b> |

## References:

1. Yao, M.; Hu, H.; Sun, B.; Wang, N.; Hu, W.; Komarneni, S., Self-Supportive Mesoporous Ni/Co/Fe Phosphosulfide Nanorods Derived from Novel Hydrothermal Electrodeposition as a Highly Efficient Electrocatalyst for Overall Water Splitting. *Small* **2019**, 15, (50), 1905201.
2. Luo, P.; Zhang, H.; Liu, L.; Zhang, Y.; Deng, J.; Xu, C.; Hu, N.; Wang, Y., Targeted synthesis of unique nickel sulfide (NiS, NiS<sub>2</sub>) microarchitectures and the applications for the enhanced water splitting system. *ACS Appl. Mater. Interfaces* **2017**, 9, (3), 2500-2508.
3. Liang, Q.; Zhong, L.; Du, C.; Luo, Y.; Zhao, J.; Zheng, Y.; Xu, J.; Ma, J.; Liu, C.; Li, S., Interfacing epitaxial dinickel phosphide to 2D nickel thiophosphate nanosheets for boosting electrocatalytic water splitting. *ACS nano* **2019**, 13, (7), 7975-7984.
4. Du, C.-F.; Dinh, K. N.; Liang, Q.; Zheng, Y.; Luo, Y.; Zhang, J.; Yan, Q., Self-Assemble and In Situ Formation of Ni<sub>1-x</sub>Fe<sub>x</sub>PS<sub>3</sub> Nanomosaic-Decorated MXene Hybrids for Overall Water Splitting. *Advanced Energy Materials* **2018**, 8, (26), 1801127.
5. Jiang, N.; Tang, Q.; Sheng, M.; You, B.; Jiang, D.-e.; Sun, Y., Nickel sulfides for electrocatalytic hydrogen evolution under alkaline conditions: a case study of crystalline NiS, NiS<sub>2</sub>, and Ni<sub>3</sub>S<sub>2</sub> nanoparticles. *Catalysis Science & Technology* **2016**, 6, (4), 1077-1084.
6. Jin, L.; Xu, H.; Wang, C.; Wang, Y.; Shang, H.; Du, Y., Multi-dimensional collaboration promotes the catalytic performance of 1D MoO<sub>3</sub> nanorods decorated with 2D NiS nanosheets for efficient water splitting. *Nanoscale* **2020**, 12, (42), 21850-21856.
7. Zhang, H.; Li, X.; Hähnel, A.; Naumann, V.; Lin, C.; Azimi, S.; Schweizer, S. L.; Maijenburg, A. W.; Wehrspohn, R. B., Bifunctional Heterostructure Assembly of NiFe LDH Nanosheets on NiCoP Nanowires for Highly Efficient and Stable Overall Water Splitting. *Adv. Funct. Mater.* **2018**, 28, (14), 1706847.
8. Du, F.; Shi, L.; Zhang, Y.; Li, T.; Wang, J.; Wen, G.; Alsaedi, A.; Hayat, T.; Zhou, Y.;

- Zou, Z., Foam-like  $\text{Co}_9\text{S}_8/\text{Ni}_3\text{S}_2$  heterostructure nanowire arrays for efficient bifunctional overall water-splitting. *Appl. Catal.B: Environ* **2019**, 253, 246-252.
9. Yao, S.; Forstner, V.; Menezes, P. W.; Panda, C.; Mebs, S.; Zolnhofer, E. M.; Miehlich, M. E.; Szilvási, T.; Kumar, N. A.; Haumann, M., From an  $\text{Fe}_2\text{P}_3$  complex to FeP nanoparticles as efficient electrocatalysts for water-splitting. *Chem.Sci.* **2018**, 9, (45), 8590-8597.
10. Qin, Q.; Chen, L.; Wei, T.; Liu, X.,  $\text{MoS}_2/\text{NiS}$  Yolk-Shell Microsphere-Based Electrodes for Overall Water Splitting and Asymmetric Supercapacitor. *Small* **2019**, 15, (29), 1803639.
